# Supplementary material for: Synergistic SiO2@NC core–shell nanospheres enhance catalytic hydrogenation of lignin-derived aromatic aldehydes
Source: Royal Society of Chemistry journal article supplement (doi:10.1039/d5gc00857c), 2025-01-01
Supplement: d5gc00857c1.pdf [file d5gc00857c1.pdf]

## Supporting Information

### **Synergistic SiO<sub>2</sub>@NC core-shell nanosphere enhances catalytic hydrogenation of lignin-derived aromatic aldehydes**

Qian Jiang<sup>ab</sup>, Shuguang Xu<sup>c</sup>, Zuzhi Li<sup>ab</sup>, Xingjie Guo<sup>ab</sup>, Rui Zhang<sup>d</sup>, Zhicheng Jiang<sup>abe\*</sup>,  
Bi Shi<sup>abe</sup>

<sup>a</sup>College of Biomass Science and Engineering, Sichuan University, Chengdu 610065, PR China

<sup>b</sup>National Engineering Laboratory for Clean Technology of Leather Manufacture, Sichuan University, Chengdu 610065, PR China

<sup>c</sup>College of Chemical Engineering, Sichuan University, Chengdu 610065, PR China

<sup>d</sup>BiomassChem Group, Faculty of Chemical Engineering, Kunming University of Science and Technology, Kunming 650500, PR China

<sup>e</sup>Key Laboratory of Leather Chemistry and Engineering (Sichuan University), Ministry of Education, Chengdu 610065, PR China

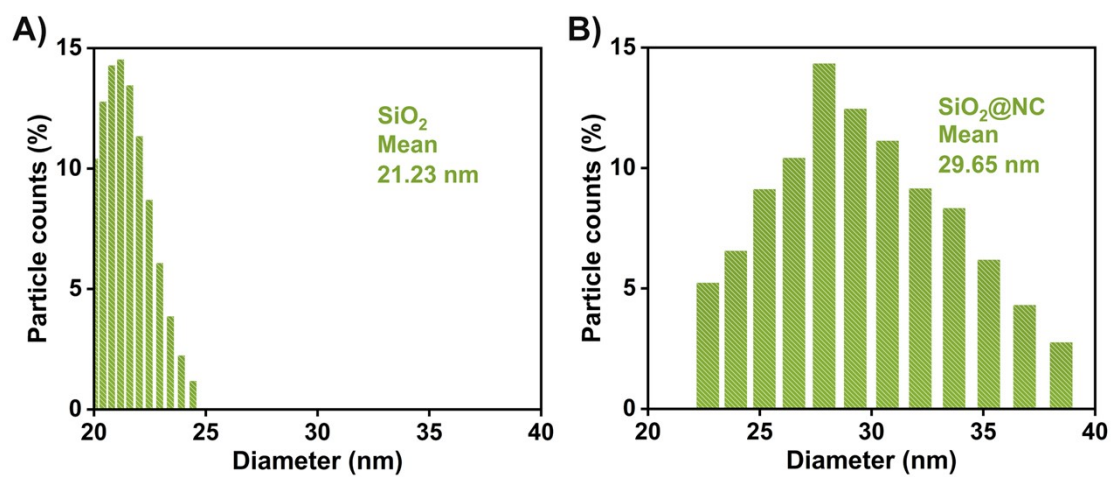

**Fig. S1 DLS analysis of the catalyst supports.**

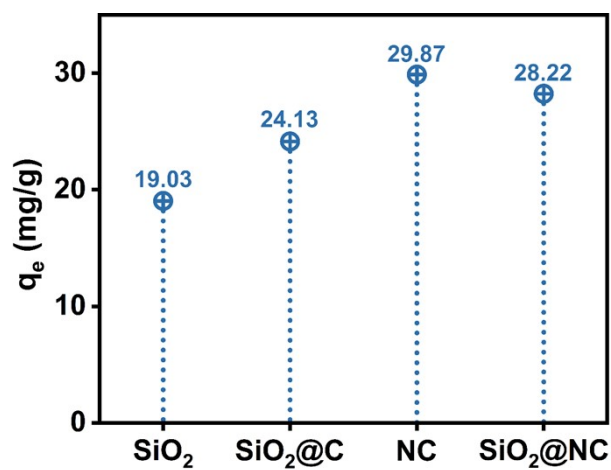

**Fig. S2  $\text{Pd}^{2+}$  adsorption of the catalysts.**

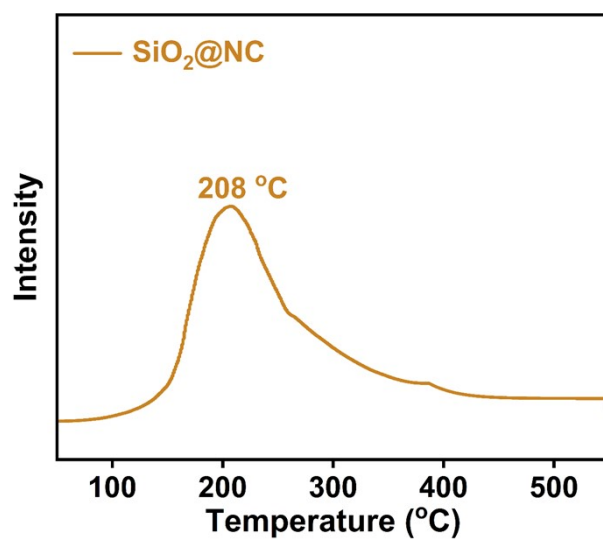

Fig. S3 NH<sub>3</sub>-TPD spectra of SiO<sub>2</sub>@NC.

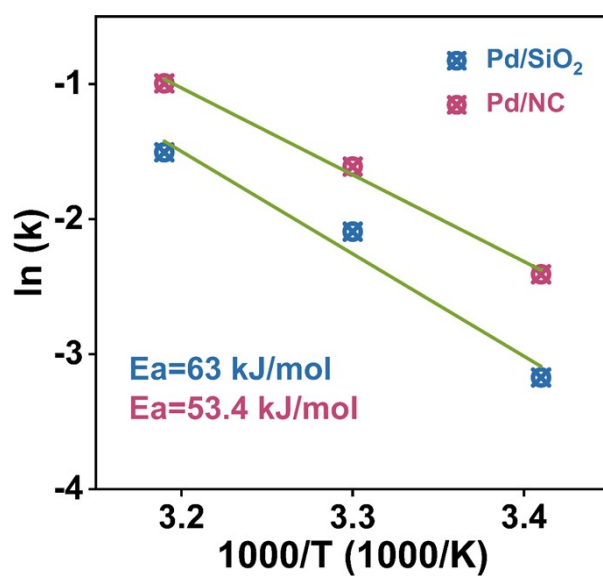

Fig. S4 Activation energy of Pd/SiO<sub>2</sub> catalysis and Pd/NC catalysis based on 5 min.

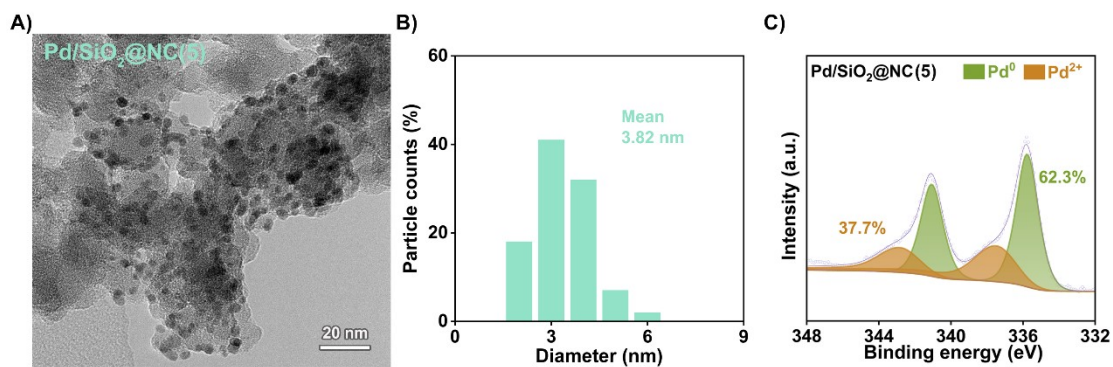

**Fig. S5 (A) TEM image, (B) particle size distribution of Pd particles and (C) Pd 3d spectra of the used Pd/SiO<sub>2</sub>@NC after five recycling cycles.**

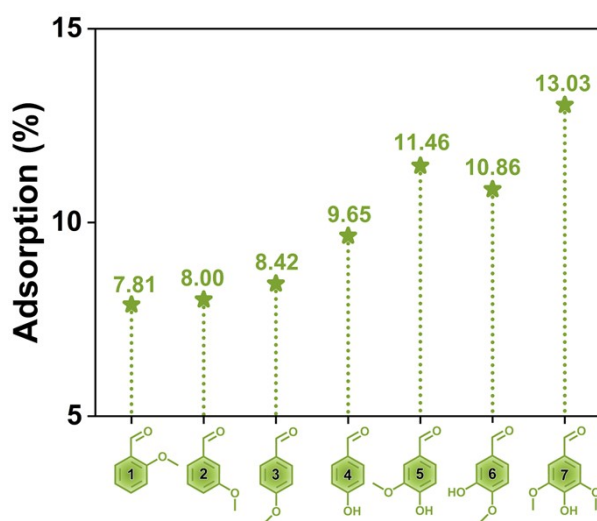

**Fig. S6 Adsorption of the lignin-derived aromatic aldehydes on the Pd/SiO<sub>2</sub>@NC.**

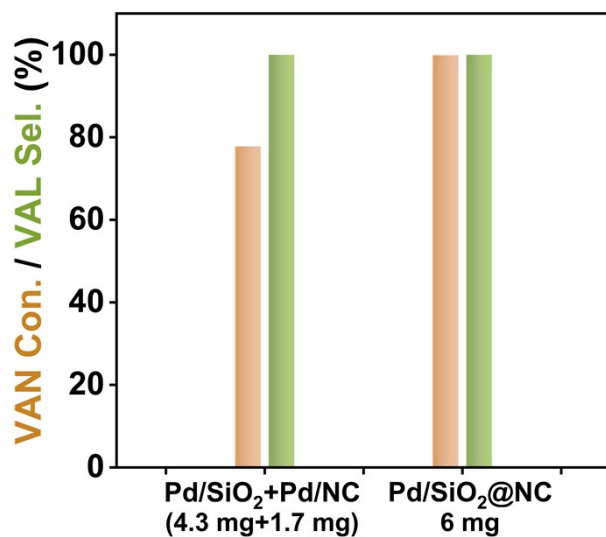

**Fig. S7 Comparing catalysis of the composite catalyst (Pd/SiO<sub>2</sub>+Pd/NC) with Pd/SiO<sub>2</sub>@NC.**

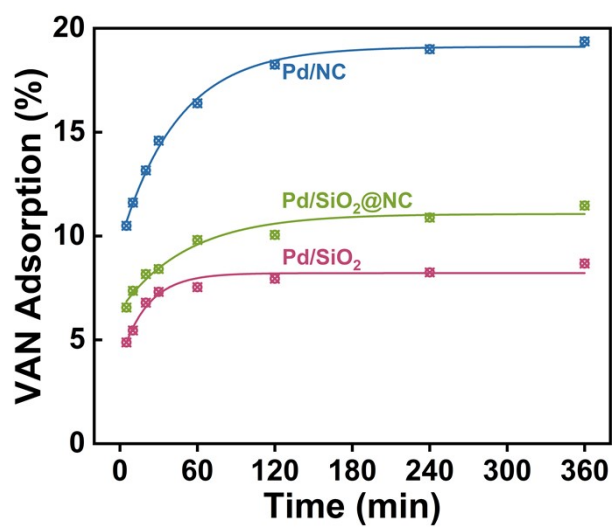

**Fig. S8 VAN adsorption on Pd/NC, Pd/SiO<sub>2</sub>@NC and Pd/SiO<sub>2</sub>.**

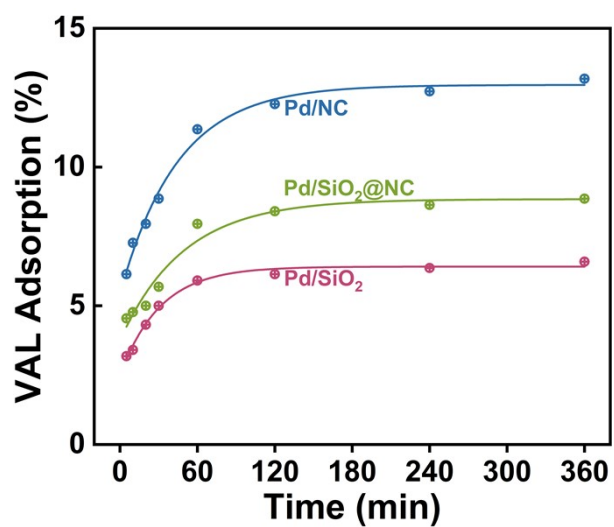

**Fig. S9 VAL adsorption on Pd/NC, Pd/SiO<sub>2</sub>@NC and Pd/SiO<sub>2</sub>.**

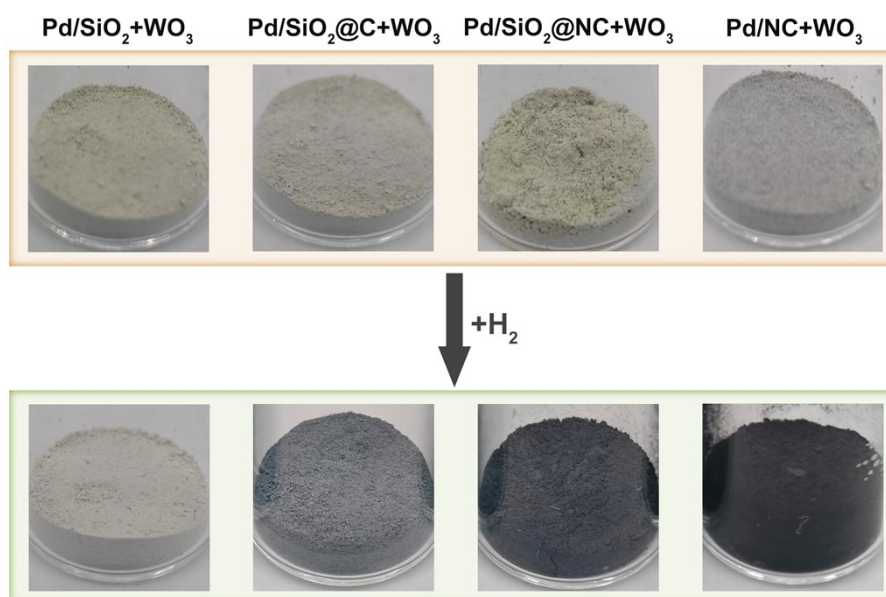

**Fig. S10 Hydrogen spillover experiments pictures of the catalysts.**
